# Supplementary material for: DNA repair protein Rad18 restricts LINE-1 mobility
Source: PubMed Central journal article supplement (PMC6203705; doi:10.1038/s41598-018-34288-9), 2018-10-26
Supplement: 41598_2018_34288_MOESM1_ESM.pdf [file 41598_2018_34288_MOESM1_ESM.pdf]

**Title:** DNA Repair Protein Rad18 restricts LINE-1 mobility

**Authors:** Yasuo Ariumi, Koudai Kawano, Mariko Yasuda-Inoue, Misao Kuroki, Hiroyuki Fukuda, Rokeya Siddiqui, Priscilla Turelli & Satoshi Tateishi

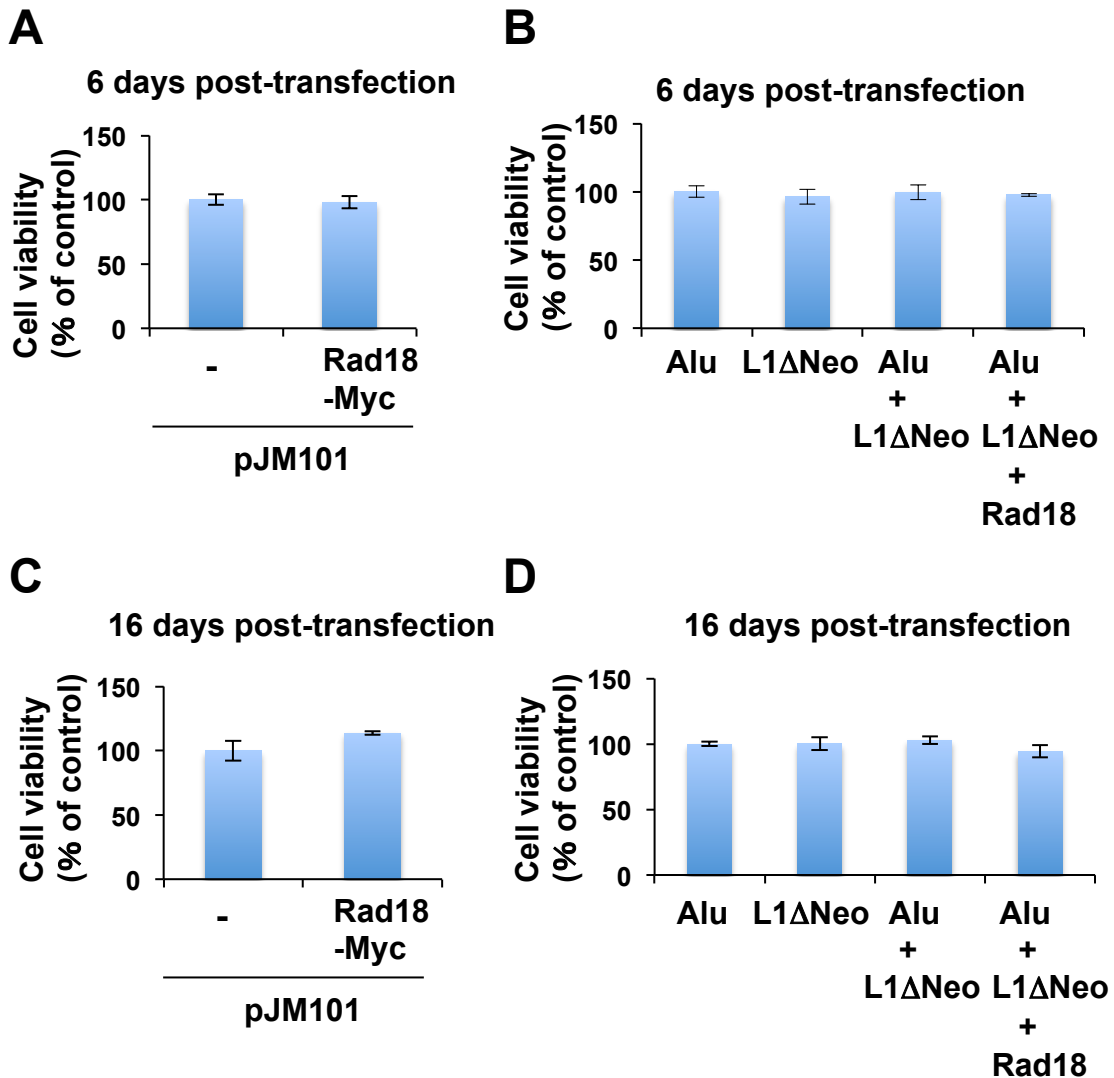

### Supplementary Fig. S1

Effect of Rad18 on cell growth and viability. **(A, B)** HeLa cells ( $2 \times 10^5$  cells) were co-transfected with 2  $\mu$ g of pJM101 and/or 2  $\mu$ g of pRad18-Myc **(A)**, or 2  $\mu$ g of pAlu pA+neoTET, 2  $\mu$ g of pJM101 L1-RP  $\Delta$ neo and/or 2  $\mu$ g of pRad18-Myc **(B)**. Next day, the cells ( $5 \times 10^3$  cells/well) were plated onto 96-well plates and cultured for 5 days. **(C, D)** HeLa cells ( $2 \times 10^5$  cells) were co-transfected with 2  $\mu$ g of pJM101 and/or 2  $\mu$ g of pRad18-Myc **(C)**, or 2  $\mu$ g of pAlu pA+neoTET, 2  $\mu$ g of pJM101 L1-RP  $\Delta$ neo and/or 2  $\mu$ g of pRad18-Myc **(D)**. After the cells were cultured for 15 days, the cells ( $5 \times 10^3$  cells/well) were plated onto 96-well plates and cultured for 1 day. The cells were subjected to the colorimetric 3-(4,5-dimethylthiazol-2-yl)-2,5-diphenyltetrazolium bromide (MTT) assay according to the manufacturer's instructions (Cell Proliferation Kit I; Roche). The absorbance was read using a microplate reader (xMark microplate spectrophotometer; Bio-rad) at 550 nm with a reference wavelength of 640 nm. The results shown are means from three independent experiments. Error bars indicate standard deviations.

**A**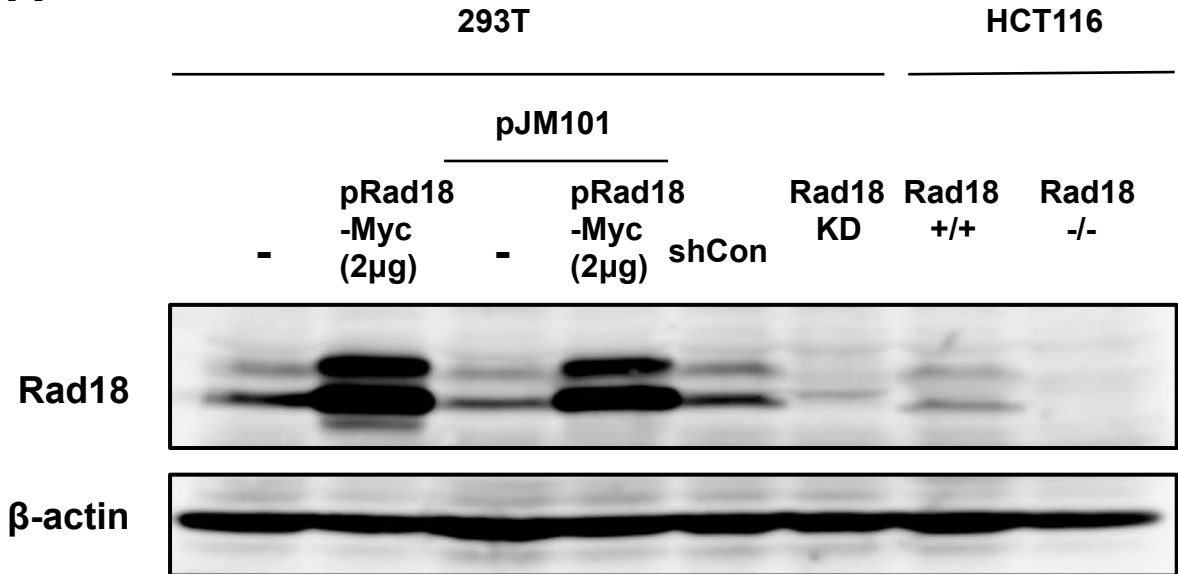**B**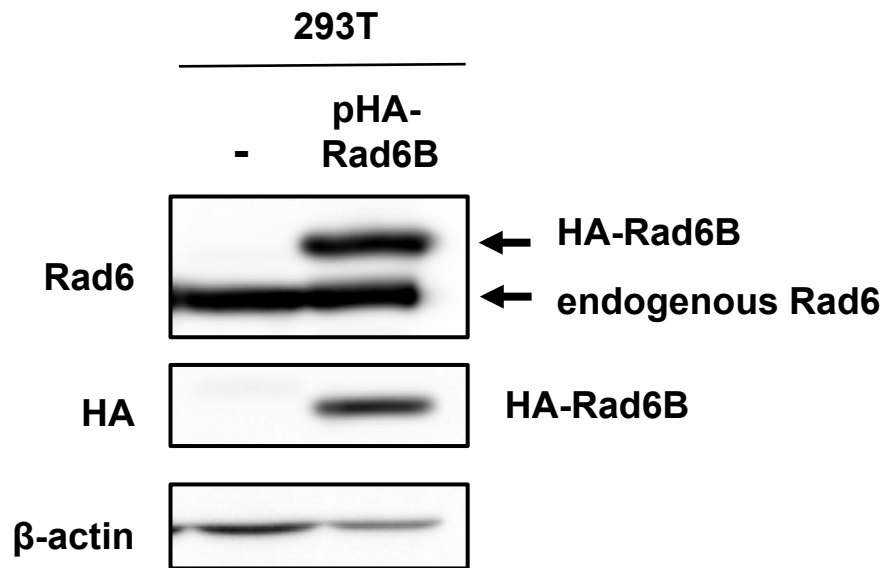**Supplementary Fig. S2**

(A) The levels of Rad18 protein expression were analyzed by Western blotting using the cell lysates of 293T cells, 293T cells transfected with 2 µg of pRad18-Myc, 293T cells co-transfected with 2 µg of pJM101 and/or 2 µg of pRad18-Myc, Rad18-knockdown 293T (Rad18KD) or the control cells (shCon), Rad18<sup>+/+</sup> or Rad18<sup>-/-</sup> HCT116 cell. The results of Western blot analysis with anti-Rad18 or anti-β-actin antibody are shown.

(B) The levels of endogenous Rad6 and exogenous HA-Rad6B protein expression were analyzed by Western blotting using the cell lysates of 293T cells transfected with 2 µg of pcDNA3-HA or pcDNA3-HA-Rad6B. The results of Western blot analysis with anti-Rad6, anti-HA, or anti-β-actin antibody are shown.

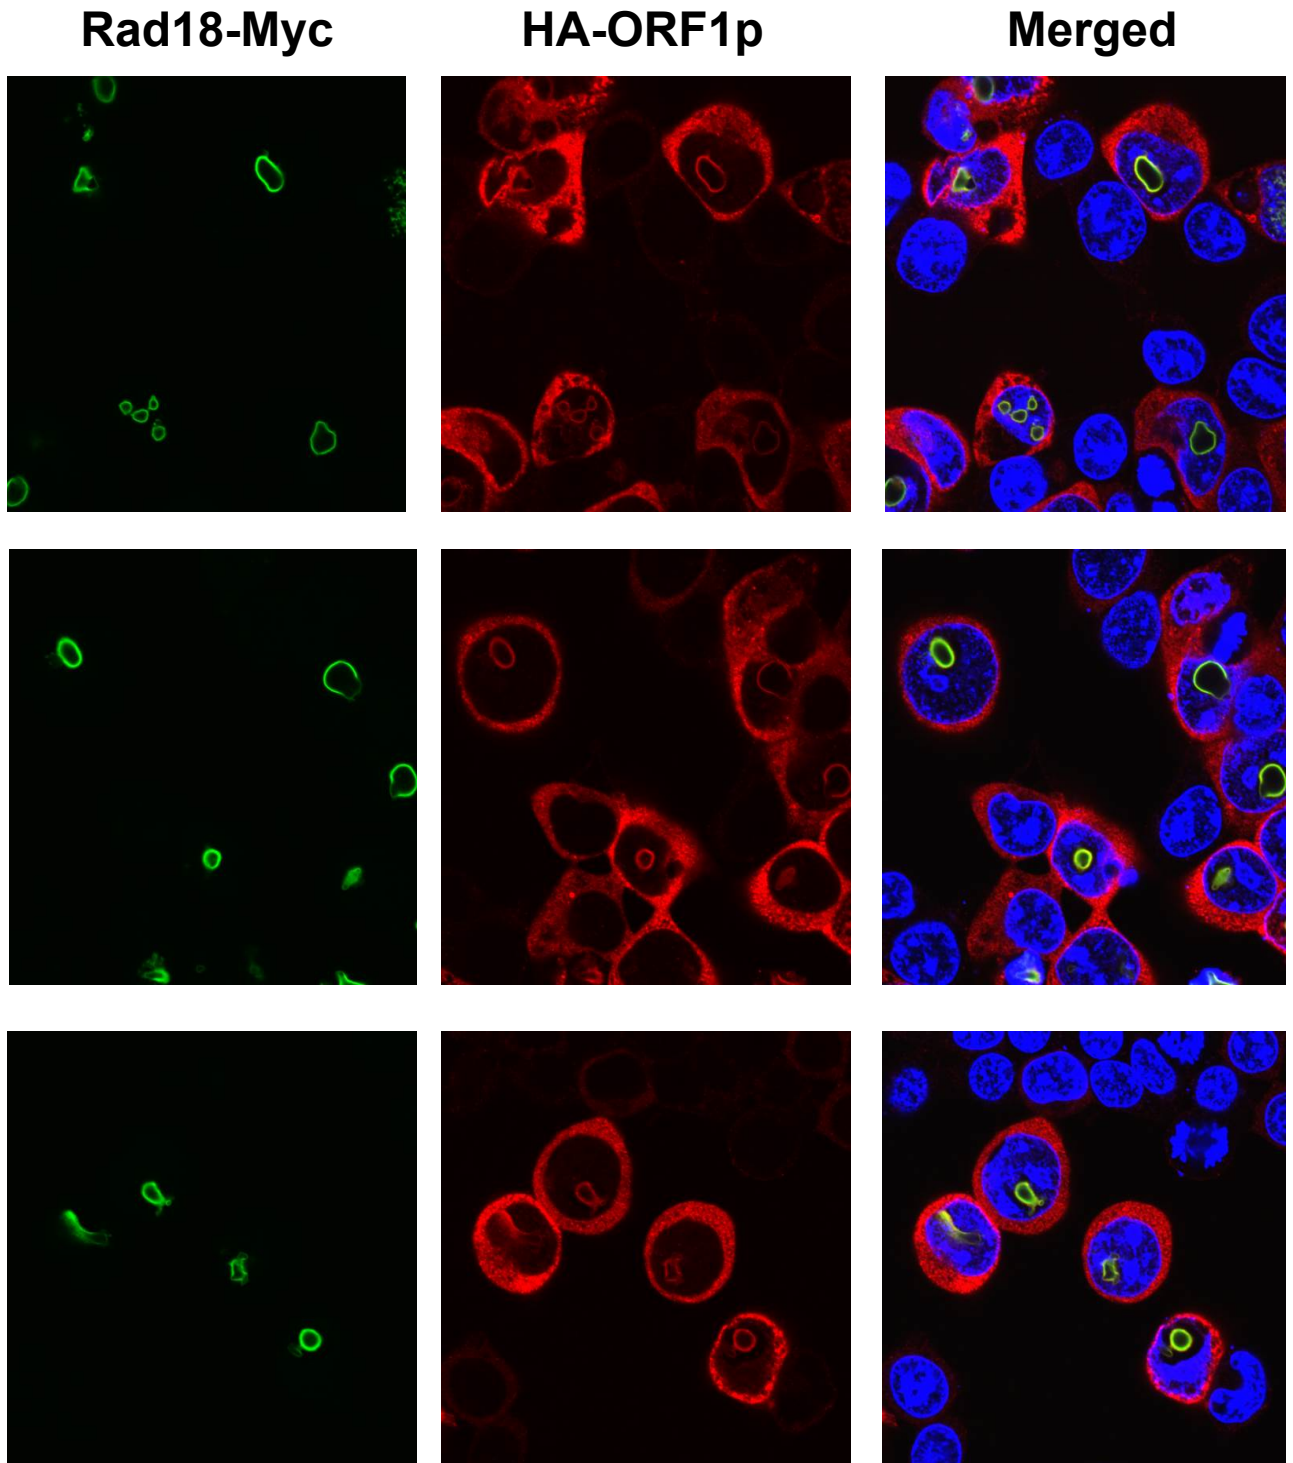

**Supplementary Fig. S3**

Subcellular localization of Rad18 and L1 ORF1p. 293T cells ( $2 \times 10^4$  cells/well) cotransfected with 100 ng of Myc-tagged Rad18-expressing plasmid and 100 ng of pcDNA3-HA-L1 ORF1 were examined by confocal laser scanning microscopy. Cells were stained with anti-HA (HA-7) and anti-Myc-tag mAb-Alexa Fluor 488 antibodies and then visualized with Alexa Fluor 594 (L1 ORF1p) or Alexa Fluor 488 (Rad18). Nuclei were stained with DAPI.
